# Supplementary material
Source: PubMed Central journal article supplement (PMC5986594)
Supplement: NIHMS943368-supplement-SDC.pdf [file NIHMS943368-supplement-SDC.pdf]

## **Supplemental Digital Content**

### **Hospital Variation in Intensive Care Resource Utilization and Mortality in Newly Diagnosed Pediatric Leukemia**

Julie C. Fitzgerald, MD, PhD;<sup>1,7</sup> Yimei Li, PhD;<sup>2,6,7</sup> Brian T. Fisher, DO, MSCE;<sup>3,4,5,7</sup> Yuan-Shung Huang, MS;<sup>4</sup> Tamara P. Miller MD,<sup>2,5</sup> Rochelle Bagatell MD,<sup>2,5</sup> Alix E. Seif, MD, MPH;<sup>2,5</sup> Richard Aplenc, MD, PhD;<sup>2,4,5,6,7</sup> Neal J. Thomas, MD, MS<sup>8</sup>

**Table: Intensive Care Unit Support Definitions**

| <b>Resource Utilization Codes</b>                                                                             | <b>Definitions Used</b>                                                                                |
|---------------------------------------------------------------------------------------------------------------|--------------------------------------------------------------------------------------------------------|
| <b>Cardiovascular Medications</b>                                                                             | Two consecutive days of exposure to any of the medications                                             |
| Dopamine                                                                                                      |                                                                                                        |
| Epinephrine (intravenous)                                                                                     |                                                                                                        |
| Norepinephrine                                                                                                |                                                                                                        |
| Dobutamine                                                                                                    |                                                                                                        |
| Milrinone                                                                                                     |                                                                                                        |
| <b>Cardiovascular Clinical Resources</b>                                                                      | Any of the clinical resource utilizations                                                              |
| Arterial catheter insertion                                                                                   |                                                                                                        |
| Arterial line monitoring                                                                                      |                                                                                                        |
| Swan-Ganz catheter insertion                                                                                  |                                                                                                        |
| Pulmonary artery line monitoring                                                                              |                                                                                                        |
| Cardiopulmonary resuscitation                                                                                 |                                                                                                        |
| Cardioversion/defibrillation                                                                                  |                                                                                                        |
| <b>Cardiovascular Procedures (ICD-9-CM<sup>a</sup> Codes)</b>                                                 | Any of the procedures                                                                                  |
| 89.64: Pulmonary artery wedge monitoring                                                                      |                                                                                                        |
| 89.63: Pulmonary artery pressure monitoring                                                                   |                                                                                                        |
| 89.61: Systemic arterial pressure monitoring                                                                  |                                                                                                        |
| 89.6: Continuous intra-arterial blood gas monitoring                                                          |                                                                                                        |
| 38.91: Arterial catheterization                                                                               |                                                                                                        |
| 00.56: Insertion or replacement of implantable pressure sensor (lead) for intracardiac hemodynamic monitoring |                                                                                                        |
| 93.93: Nonmechanical methods of resuscitation                                                                 |                                                                                                        |
| 99.6: Cardiopulmonary resuscitation, not otherwise specified                                                  |                                                                                                        |
| 99.62: Other electric countershock of heart                                                                   |                                                                                                        |
| <b>Respiratory Clinical Resources</b>                                                                         | Any reported ECMO <sup>b</sup> intervention, or two consecutive days of any of the other interventions |
| High frequency ventilation                                                                                    |                                                                                                        |
| Bilevel non-invasive mechanical ventilation                                                                   |                                                                                                        |
| Mechanical ventilation                                                                                        |                                                                                                        |
| Other specified vent assistance                                                                               |                                                                                                        |
| Nitric oxide                                                                                                  |                                                                                                        |
| Surfactant therapy                                                                                            |                                                                                                        |
| ECMO <sup>b</sup>                                                                                             |                                                                                                        |
| <b>Hemodialysis Clinical Resources</b>                                                                        | Any of the clinical resource utilizations                                                              |
| Hemoperfusion                                                                                                 |                                                                                                        |
| CAVH <sup>c</sup>                                                                                             |                                                                                                        |
| <b>Leukopheresis Procedures (ICD-9-CM<sup>a</sup> Codes)</b>                                                  | Any of the procedures                                                                                  |

|                                                                 |                                           |
|-----------------------------------------------------------------|-------------------------------------------|
| 99.72: Therapeutic leukopheresis, Therapeutic leukocytapheresis |                                           |
| 99.71: Plasmapheresis                                           |                                           |
| <b>Neurologic Clinical Resources</b>                            | Any of the clinical resource utilizations |
| Intracranial pressure monitoring                                |                                           |
| <b>Neurologic Procedures (ICD-9-CM<sup>a</sup> Codes)</b>       | Any of the procedures                     |
| 01.10: Intracranial pressure monitoring                         |                                           |
| 0.1.16: Intracranial oxygen monitoring                          |                                           |

<sup>a</sup>International Classification of Diseases-9-Clinical Modification, <sup>b</sup>ECMO: Extracorporeal membrane oxygenation, <sup>c</sup>CAVH: Continuous arteriovenous hemodialysis
